# Supplementary material for: AI in Surgical Curriculum Design and Unintended Outcomes for Technical Competencies in Simulation Training
Source: PubMed Central journal article supplement (PMC10509729; doi:10.1001/jamanetworkopen.2023.34658), 2023-09-19
Supplement: jamanetwopen-e2334658-s001.pdf [file jamanetwopen-e2334658-s001.pdf]

## Supplemental Online Content

Fazlollahi AM, Yilmaz R, Winkler-Schwartz A, et al. AI in surgical curriculum design and unintended outcomes for technical competencies. *JAMA Netw Open*. 2023;6(9):e2334658.

doi:10.1001/jamanetworkopen.2023.34658

**eTable 1.** All Metrics Showing Significant Change During Entire Procedure (Condition 1)

**eTable 2.** All Metrics Showing Significant Change During Tumor Removal (Condition 2)

This supplemental material has been provided by the authors to give readers additional information about their work.

**eTable 1.** All Metrics Showing Significant Change During Entire Procedure (Condition 1)

| Condition 1: Performance Metrics During the Entire Procedure |         |               |    |          |                         |                         | Within Group Comparison |                       |       | Baseline Between Group Comparison |                       |       | Post-Training Between Group Comparison |                       |       | Expert Benchmarks (n=14) |                 |
|--------------------------------------------------------------|---------|---------------|----|----------|-------------------------|-------------------------|-------------------------|-----------------------|-------|-----------------------------------|-----------------------|-------|----------------------------------------|-----------------------|-------|--------------------------|-----------------|
| Metric                                                       | Group   | Time          | N  | Mean     | 95.0% Lower CL for Mean | 95.0% Upper CL for Mean | Mean Difference         | Std. Error Difference | Sig.  | Mean Difference                   | Std. Error Difference | Sig.  | Mean Difference                        | Std. Error Difference | Sig.  | Mean                     | Std. Deviation  |
| maxTipDistance3D                                             | Control | Baseline      | 23 | 8.32E+01 | 6.61E+01                | 1.00E+02                | 1.67E+00                | 1.07E+01              | 0.877 | -1.48E+01                         | 1.05E+01              | 0.166 | -4.93E+01                              | 8.06E+00              | <.001 | <b>6.19E+01</b>          | <b>2.58E+01</b> |
|                                                              |         | Post-Training | 23 | 8.49E+01 | 7.08E+01                | 9.90E+01                |                         |                       |       |                                   |                       |       |                                        |                       |       |                          |                 |
|                                                              | VOA     | Baseline      | 23 | 6.84E+01 | 5.55E+01                | 8.13E+01                | -3.28E+01               | 7.38E+00              | <.001 |                                   |                       |       |                                        |                       |       |                          |                 |
|                                                              |         | Post-Training | 23 | 3.56E+01 | 2.74E+01                | 4.38E+01                |                         |                       |       |                                   |                       |       |                                        |                       |       |                          |                 |
| meanConForceBipolarHand                                      | Control | Baseline      | 23 | 6.58E-03 | 5.21E-03                | 7.95E-03                | -6.71E-04               | 7.85E-04              | 0.397 | -7.62E-04                         | 7.69E-04              | 0.327 | -2.61E-03                              | 4.91E-04              | <.001 | <b>5.52E-03</b>          | <b>1.28E-03</b> |
|                                                              |         | Post-Training | 23 | 5.91E-03 | 5.04E-03                | 6.77E-03                |                         |                       |       |                                   |                       |       |                                        |                       |       |                          |                 |
|                                                              | VOA     | Baseline      | 23 | 5.82E-03 | 5.09E-03                | 6.54E-03                | -2.52E-03               | 4.20E-04              | <.001 |                                   |                       |       |                                        |                       |       |                          |                 |
|                                                              |         | Post-Training | 23 | 3.30E-03 | 2.82E-03                | 3.78E-03                |                         |                       |       |                                   |                       |       |                                        |                       |       |                          |                 |
| meanVelocity3DCusa                                           | Control | Baseline      | 23 | 2.28E-01 | 1.95E-01                | 2.60E-01                | 3.89E-02                | 2.38E-02              | 0.109 | -6.49E-03                         | 2.35E-02              | 0.784 | -1.32E-01                              | 2.09E-02              | <.001 | <b>2.74E-01</b>          | <b>3.73E-02</b> |
|                                                              |         | Post-Training | 23 | 2.66E-01 | 2.30E-01                | 3.03E-01                |                         |                       |       |                                   |                       |       |                                        |                       |       |                          |                 |
|                                                              | VOA     | Baseline      | 23 | 2.21E-01 | 1.85E-01                | 2.58E-01                | -8.70E-02               | 2.01E-02              | <.001 |                                   |                       |       |                                        |                       |       |                          |                 |
|                                                              |         | Post-Training | 23 | 1.34E-01 | 1.14E-01                | 1.54E-01                |                         |                       |       |                                   |                       |       |                                        |                       |       |                          |                 |
| meanVelocity3DBipolar                                        | Control | Baseline      | 23 | 2.13E-01 | 1.70E-01                | 2.57E-01                | -2.33E-02               | 2.79E-02              | 0.409 | -2.84E-02                         | 2.69E-02              | 0.298 | -9.68E-02                              | 2.20E-02              | <.001 | <b>1.60E-01</b>          | <b>4.15E-02</b> |
|                                                              |         | Post-Training | 23 | 1.90E-01 | 1.52E-01                | 2.28E-01                |                         |                       |       |                                   |                       |       |                                        |                       |       |                          |                 |
|                                                              | VOA     | Baseline      | 23 | 1.85E-01 | 1.51E-01                | 2.19E-01                | -9.17E-02               | 1.98E-02              | <.001 |                                   |                       |       |                                        |                       |       |                          |                 |
|                                                              |         | Post-Training | 23 | 9.33E-02 | 7.04E-02                | 1.16E-01                |                         |                       |       |                                   |                       |       |                                        |                       |       |                          |                 |
| meanConTipDistance3D                                         | Control | Baseline      | 23 | 1.86E-01 | 1.57E-01                | 2.14E-01                | 1.20E-02                | 2.17E-02              | 0.582 | -1.90E-02                         | 1.99E-02              | 0.343 | -1.12E-01                              | 1.93E-02              | <.001 | <b>1.73E-01</b>          | <b>2.63E-02</b> |
|                                                              |         | Post-Training | 23 | 1.98E-01 | 1.63E-01                | 2.32E-01                |                         |                       |       |                                   |                       |       |                                        |                       |       |                          |                 |
|                                                              | VOA     | Baseline      | 23 | 1.67E-01 | 1.37E-01                | 1.97E-01                | -8.06E-02               | 1.67E-02              | <.001 |                                   |                       |       |                                        |                       |       |                          |                 |
|                                                              |         | Post-Training | 23 | 8.62E-02 | 6.86E-02                | 1.04E-01                |                         |                       |       |                                   |                       |       |                                        |                       |       |                          |                 |
| meanConverging3D                                             | Control | Baseline      | 23 | 1.89E-01 | 1.60E-01                | 2.19E-01                | 1.20E-02                | 2.18E-02              | 0.584 | -1.83E-02                         | 2.03E-02              | 0.373 | -1.14E-01                              | 1.88E-02              | <.001 | <b>1.77E-01</b>          | <b>2.60E-02</b> |
|                                                              |         | Post-Training | 23 | 2.01E-01 | 1.67E-01                | 2.35E-01                |                         |                       |       |                                   |                       |       |                                        |                       |       |                          |                 |
|                                                              | VOA     | Baseline      | 23 | 1.71E-01 | 1.41E-01                | 2.01E-01                | -8.38E-02               | 1.65E-02              | <.001 |                                   |                       |       |                                        |                       |       |                          |                 |

| Condition 1: Performance Metrics During the Entire Procedure |         |               |    |           |                         |                         | Within Group Comparison |                       |       | Baseline Between Group Comparison |                       |       | Post-Training Between Group Comparison |                       |       | Expert Benchmarks (n=14) |                 |
|--------------------------------------------------------------|---------|---------------|----|-----------|-------------------------|-------------------------|-------------------------|-----------------------|-------|-----------------------------------|-----------------------|-------|----------------------------------------|-----------------------|-------|--------------------------|-----------------|
| Metric                                                       | Group   | Time          | N  | Mean      | 95.0% Lower CL for Mean | 95.0% Upper CL for Mean | Mean Difference         | Std. Error Difference | Sig.  | Mean Difference                   | Std. Error Difference | Sig.  | Mean Difference                        | Std. Error Difference | Sig.  | Mean                     | Std. Deviation  |
|                                                              |         | Post-Training | 23 | 8.72E-02  | 7.01E-02                | 1.04E-01                |                         |                       |       |                                   |                       |       |                                        |                       |       |                          |                 |
| meanDiverging3D                                              | Control | Baseline      | 23 | 1.83E-01  | 1.55E-01                | 2.10E-01                | 1.27E-02                | 2.20E-02              | 0.567 | -1.96E-02                         | 1.96E-02              | 0.323 | -1.10E-01                              | 2.01E-02              | <.001 | <b>1.69E-01</b>          | <b>2.75E-02</b> |
|                                                              |         | Post-Training | 23 | 1.95E-01  | 1.59E-01                | 2.32E-01                |                         |                       |       |                                   |                       |       |                                        |                       |       |                          |                 |
|                                                              | VOA     | Baseline      | 23 | 1.63E-01  | 1.33E-01                | 1.93E-01                |                         |                       |       |                                   |                       |       |                                        |                       |       |                          |                 |
|                                                              |         | Post-Training | 23 | 8.53E-02  | 6.70E-02                | 1.04E-01                |                         |                       |       |                                   |                       |       |                                        |                       |       |                          |                 |
| meanVolume_tissueDr                                          | Control | Baseline      | 23 | -8.14E-05 | -1.07E-04               | -5.61E-05               | -4.64E-05               | 2.04E-05              | 0.027 | -1.41E-05                         | 1.93E-05              | 0.468 | 7.05E-05                               | 1.97E-05              | <.001 | <b>-9.26E-05</b>         | <b>3.35E-05</b> |
|                                                              |         | Post-Training | 23 | -1.28E-04 | -1.61E-04               | -9.41E-05               |                         |                       |       |                                   |                       |       |                                        |                       |       |                          |                 |
|                                                              | VOA     | Baseline      | 23 | -9.55E-05 | -1.27E-04               | -6.41E-05               |                         |                       |       |                                   |                       |       |                                        |                       |       |                          |                 |
|                                                              |         | Post-Training | 23 | -5.74E-05 | -7.88E-05               | -3.59E-05               |                         |                       |       |                                   |                       |       |                                        |                       |       |                          |                 |
| maxVelocity3DCusa                                            | Control | Baseline      | 23 | 4.79E+00  | 4.19E+00                | 5.39E+00                | 5.08E+00                | 5.26E-02              | 0.797 | 3.04E+00                          | 4.81E-02              | 0.063 | -6.46E+00                              | 3.85E-02              | <.001 | <b>3.78E-01</b>          | <b>8.85E-02</b> |
|                                                              |         | Post-Training | 23 | 9.87E+00  | 4.13E+00                | 1.56E+01                |                         |                       |       |                                   |                       |       |                                        |                       |       |                          |                 |
|                                                              | VOA     | Baseline      | 23 | 7.83E+00  | 2.57E+00                | 1.31E+01                |                         |                       |       |                                   |                       |       |                                        |                       |       |                          |                 |
|                                                              |         | Post-Training | 23 | 3.41E+00  | 1.87E+00                | 4.94E+00                |                         |                       |       |                                   |                       |       |                                        |                       |       |                          |                 |
| maxConForceBipolarHand                                       | Control | Baseline      | 23 | 3.91E-01  | 3.10E-01                | 4.72E-01                | -1.36E-02               | 3.83E-01              | 0.395 | -9.18E-02                         | 4.38E-01              | 0.421 | -2.09E-01                              | 3.50E-01              | <.001 | <b>4.98E+00</b>          | <b>1.37E+00</b> |
|                                                              |         | Post-Training | 23 | 3.77E-01  | 3.06E-01                | 4.49E-01                |                         |                       |       |                                   |                       |       |                                        |                       |       |                          |                 |
|                                                              | VOA     | Baseline      | 23 | 2.99E-01  | 2.45E-01                | 3.53E-01                |                         |                       |       |                                   |                       |       |                                        |                       |       |                          |                 |
|                                                              |         | Post-Training | 23 | 1.68E-01  | 1.41E-01                | 1.96E-01                |                         |                       |       |                                   |                       |       |                                        |                       |       |                          |                 |
| maxConTipDistance3D                                          | Control | Baseline      | 23 | 5.45E+00  | 4.92E+00                | 5.98E+00                | 2.77E+00                | 1.67E+00              | 0.104 | 7.44E-01                          | 1.13E+00              | 0.512 | -5.23E+00                              | 1.86E+00              | 0.007 | <b>5.75E+00</b>          | <b>3.17E+00</b> |
|                                                              |         | Post-Training | 23 | 8.22E+00  | 4.81E+00                | 1.16E+01                |                         |                       |       |                                   |                       |       |                                        |                       |       |                          |                 |
|                                                              | VOA     | Baseline      | 23 | 6.19E+00  | 3.83E+00                | 8.56E+00                |                         |                       |       |                                   |                       |       |                                        |                       |       |                          |                 |
|                                                              |         | Post-Training | 23 | 2.98E+00  | 1.50E+00                | 4.47E+00                |                         |                       |       |                                   |                       |       |                                        |                       |       |                          |                 |
| maxDiverging3D                                               | Control | Baseline      | 23 | 5.02E+00  | 4.54E+00                | 5.51E+00                | 2.82E+00                | 1.58E+00              | 0.080 | 1.08E+00                          | 1.13E+00              | 0.341 | -4.99E+00                              | 1.74E+00              | 0.006 | <b>5.14E+00</b>          | <b>2.57E+00</b> |
|                                                              |         | Post-Training | 23 | 7.85E+00  | 4.62E+00                | 1.11E+01                |                         |                       |       |                                   |                       |       |                                        |                       |       |                          |                 |
|                                                              | VOA     | Baseline      | 23 | 6.11E+00  | 3.73E+00                | 8.49E+00                |                         |                       |       |                                   |                       |       |                                        |                       |       |                          |                 |
|                                                              |         | Post-Training | 23 | 2.86E+00  | 1.56E+00                | 4.16E+00                |                         |                       |       |                                   |                       |       |                                        |                       |       |                          |                 |
|                                                              | Control | Baseline      | 23 | 3.36E-03  | 2.29E-03                | 4.44E-03                | -9.01E-04               | 5.50E-04              | 0.108 | -5.84E-04                         | 5.80E-04              | 0.319 | -6.87E-04                              | 2.15E-04              | 0.003 | <b>2.72E-03</b>          | <b>7.00E-04</b> |

| Condition 1: Performance Metrics During the Entire Procedure |         |               |    |          |                         |                         | Within Group Comparison |                       |       | Baseline Between Group Comparison |                       |       | Post-Training Between Group Comparison |                       |       | Expert Benchmarks (n=14) |                |
|--------------------------------------------------------------|---------|---------------|----|----------|-------------------------|-------------------------|-------------------------|-----------------------|-------|-----------------------------------|-----------------------|-------|----------------------------------------|-----------------------|-------|--------------------------|----------------|
| Metric                                                       | Group   | Time          | N  | Mean     | 95.0% Lower CL for Mean | 95.0% Upper CL for Mean | Mean Difference         | Std. Error Difference | Sig.  | Mean Difference                   | Std. Error Difference | Sig.  | Mean Difference                        | Std. Error Difference | Sig.  | Mean                     | Std. Deviation |
| medianConForceBipolarHand                                    |         | Post-Training | 23 | 2.46E-03 | 2.11E-03                | 2.82E-03                |                         |                       |       |                                   |                       |       |                                        |                       |       |                          |                |
|                                                              | VOA     | Baseline      | 23 | 2.78E-03 | 2.35E-03                | 3.21E-03                | -1.00E-03               | 2.39E-04              | <.001 |                                   |                       |       |                                        |                       |       |                          |                |
|                                                              |         | Post-Training | 23 | 1.78E-03 | 1.53E-03                | 2.03E-03                |                         |                       |       |                                   |                       |       |                                        |                       |       |                          |                |
| medianConTipDistance3D                                       | Control | Baseline      | 23 | 7.97E-02 | 6.77E-02                | 9.18E-02                | 4.55E-03                | 8.42E-03              | 0.592 |                                   |                       |       |                                        |                       |       |                          |                |
|                                                              |         | Post-Training | 23 | 8.43E-02 | 7.18E-02                | 9.68E-02                |                         |                       |       |                                   |                       |       |                                        |                       |       |                          |                |
|                                                              | VOA     | Baseline      | 23 | 7.89E-02 | 6.52E-02                | 9.25E-02                | -3.04E-02               | 7.79E-03              | <.001 | -8.86E-04                         | 8.79E-03              | 0.92  | -3.58E-02                              | 7.46E-03              | <.001 | 9.49E-02                 | 1.30E-02       |
|                                                              |         | Post-Training | 23 | 4.85E-02 | 3.99E-02                | 5.71E-02                |                         |                       |       |                                   |                       |       |                                        |                       |       |                          |                |
| medianConverging3D                                           | Control | Baseline      | 23 | 8.32E-02 | 7.03E-02                | 9.60E-02                | 5.99E-03                | 8.78E-03              | 0.498 |                                   |                       |       |                                        |                       |       |                          |                |
|                                                              |         | Post-Training | 23 | 8.92E-02 | 7.64E-02                | 1.02E-01                |                         |                       |       |                                   |                       |       |                                        |                       |       |                          |                |
|                                                              | VOA     | Baseline      | 23 | 8.31E-02 | 6.79E-02                | 9.83E-02                | -3.38E-02               | 8.51E-03              | <.001 | -4.16E-05                         | 9.55E-03              | 0.997 | -3.98E-02                              | 7.68E-03              | <.001 | 9.98E-02                 | 1.44E-02       |
|                                                              |         | Post-Training | 23 | 4.94E-02 | 4.04E-02                | 5.83E-02                |                         |                       |       |                                   |                       |       |                                        |                       |       |                          |                |
| medianDiverging3D                                            | Control | Baseline      | 23 | 7.66E-02 | 6.50E-02                | 8.83E-02                | 3.81E-03                | 8.17E-03              | 0.643 |                                   |                       |       |                                        |                       |       |                          |                |
|                                                              |         | Post-Training | 23 | 8.04E-02 | 6.82E-02                | 9.26E-02                |                         |                       |       |                                   |                       |       |                                        |                       |       |                          |                |
|                                                              | VOA     | Baseline      | 23 | 7.57E-02 | 6.31E-02                | 8.82E-02                | -2.78E-02               | 7.24E-03              | <.001 | -9.69E-04                         | 8.25E-03              | 0.907 | -3.26E-02                              | 7.27E-03              | <.001 | 9.12E-02                 | 1.24E-02       |
|                                                              |         | Post-Training | 23 | 4.79E-02 | 3.96E-02                | 5.62E-02                |                         |                       |       |                                   |                       |       |                                        |                       |       |                          |                |
| meanAcceleration3DCusa                                       | Control | Baseline      | 23 | 4.41E-02 | 3.84E-02                | 4.98E-02                | 5.27E-03                | 4.99E-03              | 0.296 |                                   |                       |       |                                        |                       |       |                          |                |
|                                                              |         | Post-Training | 23 | 4.94E-02 | 4.08E-02                | 5.80E-02                |                         |                       |       |                                   |                       |       |                                        |                       |       |                          |                |
|                                                              | VOA     | Baseline      | 23 | 4.38E-02 | 3.67E-02                | 5.09E-02                | -1.69E-02               | 3.93E-03              | <.001 | -3.71E-04                         | 4.37E-03              | 0.933 | -2.25E-02                              | 4.71E-03              | <.001 | 6.36E-02                 | 1.02E-02       |
|                                                              |         | Post-Training | 23 | 2.69E-02 | 2.29E-02                | 3.08E-02                |                         |                       |       |                                   |                       |       |                                        |                       |       |                          |                |
| meanSpeeding3DCusa                                           | Control | Baseline      | 23 | 4.46E-02 | 3.90E-02                | 5.03E-02                | 5.23E-03                | 4.93E-03              | 0.294 |                                   |                       |       |                                        |                       |       |                          |                |
|                                                              |         | Post-Training | 23 | 4.99E-02 | 4.14E-02                | 5.84E-02                |                         |                       |       |                                   |                       |       |                                        |                       |       |                          |                |
|                                                              | VOA     | Baseline      | 23 | 4.44E-02 | 3.73E-02                | 5.15E-02                | -1.69E-02               | 3.94E-03              | <.001 | -2.67E-04                         | 4.34E-03              | 0.951 | -2.24E-02                              | 4.68E-03              | <.001 | 6.50E-02                 | 1.00E-02       |
|                                                              |         | Post-Training | 23 | 2.75E-02 | 2.35E-02                | 3.16E-02                |                         |                       |       |                                   |                       |       |                                        |                       |       |                          |                |
| meanSlowing3DCusa                                            | Control | Baseline      | 23 | 4.35E-02 | 3.78E-02                | 4.92E-02                | 5.10E-03                | 4.90E-03              | 0.303 |                                   |                       |       |                                        |                       |       |                          |                |
|                                                              |         | Post-Training | 23 | 4.86E-02 | 4.03E-02                | 5.69E-02                |                         |                       |       |                                   |                       |       |                                        |                       |       |                          |                |
|                                                              | VOA     | Baseline      | 23 | 4.31E-02 | 3.60E-02                | 5.01E-02                | -1.69E-02               | 3.88E-03              | <.001 | -4.28E-04                         | 4.36E-03              | 0.922 | -2.24E-02                              | 4.58E-03              | <.001 | 6.20E-02                 | 1.02E-02       |

| Condition 1: Performance Metrics During the Entire Procedure |         |               |    |          |                         |                         | Within Group Comparison |                       |       | Baseline Between Group Comparison |                       |       | Post-Training Between Group Comparison |                       |       | Expert Benchmarks (n=14) |                 |
|--------------------------------------------------------------|---------|---------------|----|----------|-------------------------|-------------------------|-------------------------|-----------------------|-------|-----------------------------------|-----------------------|-------|----------------------------------------|-----------------------|-------|--------------------------|-----------------|
| Metric                                                       | Group   | Time          | N  | Mean     | 95.0% Lower CL for Mean | 95.0% Upper CL for Mean | Mean Difference         | Std. Error Difference | Sig.  | Mean Difference                   | Std. Error Difference | Sig.  | Mean Difference                        | Std. Error Difference | Sig.  | Mean                     | Std. Deviation  |
|                                                              |         | Post-Training | 23 | 2.62E-02 | 2.23E-02                | 3.01E-02                |                         |                       |       |                                   |                       |       |                                        |                       |       |                          |                 |
| meanSlowing3DBipolar                                         | Control | Baseline      | 23 | 4.39E-02 | 3.60E-02                | 5.18E-02                | -9.08E-03               | 5.05E-03              | 0.078 | -6.37E-03                         | 4.89E-03              | 0.2   | -1.47E-02                              | 4.03E-03              | <.001 | <b>3.87E-02</b>          | <b>1.08E-02</b> |
|                                                              |         | Post-Training | 23 | 3.48E-02 | 2.81E-02                | 4.16E-02                |                         |                       |       |                                   |                       |       |                                        |                       |       |                          |                 |
|                                                              | VOA     | Baseline      | 23 | 3.76E-02 | 3.14E-02                | 4.37E-02                | -1.74E-02               | 3.69E-03              | <.001 |                                   |                       |       |                                        |                       |       |                          |                 |
|                                                              |         | Post-Training | 23 | 2.02E-02 | 1.56E-02                | 2.47E-02                |                         |                       |       |                                   |                       |       |                                        |                       |       |                          |                 |
| maxAcceleration3DBipolar                                     | Control | Baseline      | 23 | 2.10E+00 | 1.77E+00                | 2.43E+00                | 6.33E-02                | 2.18E-01              | 0.773 | -1.59E-01                         | 2.26E-01              | 0.486 | -1.24E+00                              | 1.72E-01              | <.001 | <b>1.37E+00</b>          | <b>5.43E-01</b> |
|                                                              |         | Post-Training | 23 | 2.17E+00 | 1.86E+00                | 2.47E+00                |                         |                       |       |                                   |                       |       |                                        |                       |       |                          |                 |
|                                                              | VOA     | Baseline      | 23 | 1.94E+00 | 1.62E+00                | 2.27E+00                | -1.01E+00               | 1.77E-01              | <.001 |                                   |                       |       |                                        |                       |       |                          |                 |
|                                                              |         | Post-Training | 23 | 9.30E-01 | 7.66E-01                | 1.09E+00                |                         |                       |       |                                   |                       |       |                                        |                       |       |                          |                 |
| maxSpeeding3DBipolar                                         | Control | Baseline      | 23 | 1.85E+00 | 1.60E+00                | 2.10E+00                | 6.52E-02                | 1.91E-01              | 0.734 | -1.58E-01                         | 1.91E-01              | 0.412 | -1.03E+00                              | 1.72E-01              | <.001 | <b>1.59E+00</b>          | <b>5.08E-01</b> |
|                                                              |         | Post-Training | 23 | 1.91E+00 | 1.61E+00                | 2.22E+00                |                         |                       |       |                                   |                       |       |                                        |                       |       |                          |                 |
|                                                              | VOA     | Baseline      | 23 | 1.69E+00 | 1.38E+00                | 2.00E+00                | -8.04E-01               | 1.70E-01              | <.001 |                                   |                       |       |                                        |                       |       |                          |                 |
|                                                              |         | Post-Training | 23 | 8.84E-01 | 7.15E-01                | 1.05E+00                |                         |                       |       |                                   |                       |       |                                        |                       |       |                          |                 |
| maxSlowing3DBipolar                                          | Control | Baseline      | 23 | 1.98E+00 | 1.61E+00                | 2.35E+00                | 1.37E-02                | 2.27E-01              | 0.952 | -1.62E-01                         | 2.43E-01              | 0.51  | -1.25E+00                              | 1.57E-01              | <.001 | <b>1.72E+00</b>          | <b>7.68E-01</b> |
|                                                              |         | Post-Training | 23 | 1.99E+00 | 1.71E+00                | 2.28E+00                |                         |                       |       |                                   |                       |       |                                        |                       |       |                          |                 |
|                                                              | VOA     | Baseline      | 23 | 1.82E+00 | 1.48E+00                | 2.15E+00                | -1.07E+00               | 1.74E-01              | <.001 |                                   |                       |       |                                        |                       |       |                          |                 |
|                                                              |         | Post-Training | 23 | 7.50E-01 | 6.14E-01                | 8.85E-01                |                         |                       |       |                                   |                       |       |                                        |                       |       |                          |                 |
| medianAcceleration3DCusa                                     | Control | Baseline      | 23 | 1.92E-02 | 1.71E-02                | 2.13E-02                | 1.24E-04                | 1.34E-03              | 0.927 | -1.44E-04                         | 1.58E-03              | 0.928 | -5.85E-03                              | 1.23E-03              | <.001 | <b>3.51E-02</b>          | <b>4.10E-03</b> |
|                                                              |         | Post-Training | 23 | 1.93E-02 | 1.75E-02                | 2.11E-02                |                         |                       |       |                                   |                       |       |                                        |                       |       |                          |                 |
|                                                              | VOA     | Baseline      | 23 | 1.91E-02 | 1.65E-02                | 2.16E-02                | -5.58E-03               | 1.50E-03              | <.001 |                                   |                       |       |                                        |                       |       |                          |                 |
|                                                              |         | Post-Training | 23 | 1.35E-02 | 1.17E-02                | 1.53E-02                |                         |                       |       |                                   |                       |       |                                        |                       |       |                          |                 |
| medianSlowing3DCusa                                          | Control | Baseline      | 23 | 1.87E-02 | 1.67E-02                | 2.07E-02                | 2.89E-04                | 1.29E-03              | 0.824 | -1.12E-04                         | 1.53E-03              | 0.942 | -5.66E-03                              | 1.19E-03              | <.001 | <b>3.46E-02</b>          | <b>4.25E-03</b> |
|                                                              |         | Post-Training | 23 | 1.90E-02 | 1.73E-02                | 2.07E-02                |                         |                       |       |                                   |                       |       |                                        |                       |       |                          |                 |
|                                                              | VOA     | Baseline      | 23 | 1.86E-02 | 1.61E-02                | 2.11E-02                | -5.26E-03               | 1.45E-03              | <.001 |                                   |                       |       |                                        |                       |       |                          |                 |
|                                                              |         | Post-Training | 23 | 1.33E-02 | 1.16E-02                | 1.51E-02                |                         |                       |       |                                   |                       |       |                                        |                       |       |                          |                 |
|                                                              | Control | Baseline      | 23 | 4.93E-02 | 4.32E-02                | 5.54E-02                | 8.68E-03                | 6.22E-03              | 0.169 | 9.76E-04                          | 5.23E-03              | 0.853 | -2.56E-02                              | 6.11E-03              | <.001 | <b>6.76E-02</b>          | <b>1.38E-02</b> |

| Condition 1: Performance Metrics During the Entire Procedure |         |               |    |          |                         |                         | Within Group Comparison |                       |       | Baseline Between Group Comparison |                       |       | Post-Training Between Group Comparison |                       |       | Expert Benchmarks (n=14) |                |
|--------------------------------------------------------------|---------|---------------|----|----------|-------------------------|-------------------------|-------------------------|-----------------------|-------|-----------------------------------|-----------------------|-------|----------------------------------------|-----------------------|-------|--------------------------|----------------|
| Metric                                                       | Group   | Time          | N  | Mean     | 95.0% Lower CL for Mean | 95.0% Upper CL for Mean | Mean Difference         | Std. Error Difference | Sig.  | Mean Difference                   | Std. Error Difference | Sig.  | Mean Difference                        | Std. Error Difference | Sig.  | Mean                     | Std. Deviation |
| meanConAcceleration3DC<br>usa                                |         | Post-Training | 23 | 5.80E-02 | 4.67E-02                | 6.93E-02                |                         |                       |       |                                   |                       |       |                                        |                       |       |                          |                |
|                                                              | VOA     | Baseline      | 23 | 5.03E-02 | 4.12E-02                | 5.94E-02                | -1.79E-02               | 4.96E-03              | <.001 |                                   |                       |       |                                        |                       |       |                          |                |
|                                                              |         | Post-Training | 23 | 3.24E-02 | 2.76E-02                | 3.71E-02                |                         |                       |       |                                   |                       |       |                                        |                       |       |                          |                |
| meanConAcceleration3DBi<br>polar                             | Control | Baseline      | 23 | 5.09E-02 | 4.22E-02                | 5.96E-02                | -1.04E-02               | 5.52E-03              | 0.066 |                                   |                       |       |                                        |                       |       |                          |                |
|                                                              |         | Post-Training | 23 | 4.05E-02 | 3.31E-02                | 4.79E-02                |                         |                       |       |                                   |                       |       |                                        |                       |       |                          |                |
|                                                              | VOA     | Baseline      | 23 | 4.38E-02 | 3.69E-02                | 5.06E-02                | -1.86E-02               | 4.23E-03              | <.001 | -7.14E-03                         | 5.41E-03              | 0.194 | -1.53E-02                              | 4.51E-03              | 0.001 | 4.44E-02                 | 1.30E-02       |
|                                                              |         | Post-Training | 23 | 2.52E-02 | 1.97E-02                | 3.07E-02                |                         |                       |       |                                   |                       |       |                                        |                       |       |                          |                |
| maxConAcceleration3DBi<br>olar                               | Control | Baseline      | 23 | 2.73E+00 | 2.31E+00                | 3.15E+00                | 2.92E-01                | 3.17E-01              | 0.360 |                                   |                       |       |                                        |                       |       |                          |                |
|                                                              |         | Post-Training | 23 | 3.02E+00 | 2.52E+00                | 3.53E+00                |                         |                       |       |                                   |                       |       |                                        |                       |       |                          |                |
|                                                              | VOA     | Baseline      | 23 | 2.47E+00 | 1.98E+00                | 2.95E+00                | -1.28E+00               | 2.51E-01              | <.001 | -2.66E-01                         | 3.09E-01              | 0.393 | -1.84E+00                              | 2.68E-01              | <.001 | 2.34E+00                 | 9.87E-01       |
|                                                              |         | Post-Training | 23 | 1.18E+00 | 9.97E-01                | 1.37E+00                |                         |                       |       |                                   |                       |       |                                        |                       |       |                          |                |
| medianConAcceleration3D<br>Cusa                              | Control | Baseline      | 23 | 2.18E-02 | 1.96E-02                | 2.40E-02                | 1.79E-03                | 1.44E-03              | 0.220 |                                   |                       |       |                                        |                       |       |                          |                |
|                                                              |         | Post-Training | 23 | 2.36E-02 | 2.16E-02                | 2.56E-02                |                         |                       |       |                                   |                       |       |                                        |                       |       |                          |                |
|                                                              | VOA     | Baseline      | 23 | 2.20E-02 | 1.92E-02                | 2.48E-02                | -5.10E-03               | 1.69E-03              | 0.004 | 1.86E-04                          | 1.70E-03              | 0.913 | -6.71E-03                              | 1.41E-03              | <.001 | 3.47E-02                 | 4.15E-03       |
|                                                              |         | Post-Training | 23 | 1.69E-02 | 1.48E-02                | 1.90E-02                |                         |                       |       |                                   |                       |       |                                        |                       |       |                          |                |
| meanForceBipolarHand                                         | Control | Baseline      | 23 | 3.64E-01 | 2.94E-01                | 4.33E-01                | 1.37E-01                | 4.82E-02              | 0.007 |                                   |                       |       |                                        |                       |       |                          |                |
|                                                              |         | Post-Training | 23 | 5.00E-01 | 4.29E-01                | 5.72E-01                |                         |                       |       |                                   |                       |       |                                        |                       |       |                          |                |
|                                                              | VOA     | Baseline      | 23 | 3.21E-01 | 2.60E-01                | 3.82E-01                | -1.11E-01               | 3.71E-02              | 0.005 | -4.26E-02                         | 4.50E-02              | 0.348 | -2.90E-01                              | 4.21E-02              | <.001 | 4.06E-01                 | 8.68E-02       |
|                                                              |         | Post-Training | 23 | 2.10E-01 | 1.63E-01                | 2.57E-01                |                         |                       |       |                                   |                       |       |                                        |                       |       |                          |                |
| meanTipDistance3D                                            | Control | Baseline      | 23 | 1.95E+01 | 1.47E+01                | 2.43E+01                | -4.36E+00               | 2.82E+00              | 0.129 |                                   |                       |       |                                        |                       |       |                          |                |
|                                                              |         | Post-Training | 23 | 1.52E+01 | 1.19E+01                | 1.85E+01                |                         |                       |       |                                   |                       |       |                                        |                       |       |                          |                |
|                                                              | VOA     | Baseline      | 23 | 1.85E+01 | 1.21E+01                | 2.48E+01                | -1.23E+01               | 3.09E+00              | <.001 | -1.07E+00                         | 3.81E+00              | 0.78  | -8.97E+00                              | 1.69E+00              | <.001 | 7.85E+00                 | 1.65E+00       |
|                                                              |         | Post-Training | 23 | 6.21E+00 | 5.47E+00                | 6.94E+00                |                         |                       |       |                                   |                       |       |                                        |                       |       |                          |                |
| maxForceBipolarHand                                          | Control | Baseline      | 23 | 9.81E-01 | 8.44E-01                | 1.12E+00                | 1.56E-01                | 9.12E-02              | 0.094 |                                   |                       |       |                                        |                       |       |                          |                |
|                                                              |         | Post-Training | 23 | 1.14E+00 | 1.01E+00                | 1.27E+00                |                         |                       |       |                                   |                       |       |                                        |                       |       |                          |                |
|                                                              | VOA     | Baseline      | 23 | 9.75E-01 | 8.38E-01                | 1.11E+00                | -3.54E-01               | 8.79E-02              | <.001 | -5.95E-03                         | 9.37E-02              | 0.95  | -5.16E-01                              | 8.58E-02              | <.001 | 8.57E-01                 | 1.47E-01       |

| Condition 1: Performance Metrics During the Entire Procedure |         |               |    |          |                         |                         | Within Group Comparison |                       |       | Baseline Between Group Comparison |                       |       | Post-Training Between Group Comparison |                       |       | Expert Benchmarks (n=14) |                 |
|--------------------------------------------------------------|---------|---------------|----|----------|-------------------------|-------------------------|-------------------------|-----------------------|-------|-----------------------------------|-----------------------|-------|----------------------------------------|-----------------------|-------|--------------------------|-----------------|
| Metric                                                       | Group   | Time          | N  | Mean     | 95.0% Lower CL for Mean | 95.0% Upper CL for Mean | Mean Difference         | Std. Error Difference | Sig.  | Mean Difference                   | Std. Error Difference | Sig.  | Mean Difference                        | Std. Error Difference | Sig.  | Mean                     | Std. Deviation  |
|                                                              |         | Post-Training | 23 | 6.21E-01 | 5.00E-01                | 7.41E-01                |                         |                       |       |                                   |                       |       |                                        |                       |       |                          |                 |
| medianForceBipolarHand                                       | Control | Baseline      | 23 | 3.55E-01 | 2.72E-01                | 4.37E-01                | 1.54E-01                | 5.50E-02              | 0.007 |                                   |                       | 0.374 | -3.11E-01                              | 4.54E-02              | <.001 | <b>4.14E-01</b>          | <b>1.06E-01</b> |
|                                                              |         | Post-Training | 23 | 5.08E-01 | 4.30E-01                | 5.86E-01                |                         |                       |       |                                   |                       |       |                                        |                       |       |                          |                 |
|                                                              | VOA     | Baseline      | 23 | 3.06E-01 | 2.31E-01                | 3.81E-01                | -1.09E-01               | 4.32E-02              | 0.015 |                                   |                       |       |                                        |                       |       |                          |                 |
|                                                              |         | Post-Training | 23 | 1.97E-01 | 1.48E-01                | 2.46E-01                |                         |                       |       |                                   |                       |       |                                        |                       |       |                          |                 |
| medianTipDistance3D                                          | Control | Baseline      | 23 | 1.73E+01 | 1.24E+01                | 2.22E+01                | -5.74E+00               | 2.85E+00              | 0.049 |                                   |                       | 0.707 | -6.22E+00                              | 1.67E+00              | <.001 | <b>6.22E+00</b>          | <b>1.08E+00</b> |
|                                                              |         | Post-Training | 23 | 1.15E+01 | 8.29E+00                | 1.48E+01                |                         |                       |       |                                   |                       |       |                                        |                       |       |                          |                 |
|                                                              | VOA     | Baseline      | 23 | 1.57E+01 | 8.68E+00                | 2.28E+01                | -1.04E+01               | 3.41E+00              | 0.004 |                                   |                       |       |                                        |                       |       |                          |                 |
|                                                              |         | Post-Training | 23 | 5.33E+00 | 4.77E+00                | 5.88E+00                |                         |                       |       |                                   |                       |       |                                        |                       |       |                          |                 |
| medianVelocity3DCusa                                         | Control | Baseline      | 23 | 1.18E-01 | 1.05E-01                | 1.31E-01                | 2.65E-02                | 8.61E-03              | 0.003 |                                   |                       | 0.545 | -5.03E-02                              | 8.60E-03              | <.001 | <b>1.79E-01</b>          | <b>2.31E-02</b> |
|                                                              |         | Post-Training | 23 | 1.45E-01 | 1.33E-01                | 1.57E-01                |                         |                       |       |                                   |                       |       |                                        |                       |       |                          |                 |
|                                                              | VOA     | Baseline      | 23 | 1.25E-01 | 1.06E-01                | 1.44E-01                | -3.05E-02               | 1.10E-02              | 0.008 |                                   |                       |       |                                        |                       |       |                          |                 |
|                                                              |         | Post-Training | 23 | 9.44E-02 | 8.15E-02                | 1.07E-01                |                         |                       |       |                                   |                       |       |                                        |                       |       |                          |                 |
| medianVelocity3DBipolar                                      | Control | Baseline      | 23 | 8.19E-02 | 6.18E-02                | 1.02E-01                | -2.58E-02               | 1.29E-02              | 0.051 |                                   |                       | 0.39  | -7.92E-03                              | 1.03E-02              | 0.445 | <b>5.44E-02</b>          | <b>1.70E-02</b> |
|                                                              |         | Post-Training | 23 | 5.61E-02 | 3.88E-02                | 7.35E-02                |                         |                       |       |                                   |                       |       |                                        |                       |       |                          |                 |
|                                                              | VOA     | Baseline      | 23 | 7.10E-02 | 5.53E-02                | 8.68E-02                | -2.28E-02               | 9.44E-03              | 0.02  |                                   |                       |       |                                        |                       |       |                          |                 |
|                                                              |         | Post-Training | 23 | 4.82E-02 | 3.66E-02                | 5.98E-02                |                         |                       |       |                                   |                       |       |                                        |                       |       |                          |                 |
| meanAcceleration3DBipolar                                    | Control | Baseline      | 23 | 4.50E-02 | 3.71E-02                | 5.29E-02                | -9.12E-03               | 5.08E-03              | 0.079 |                                   |                       | 0.209 | -1.52E-02                              | 4.10E-03              | <.001 | <b>3.96E-02</b>          | <b>1.10E-02</b> |
|                                                              |         | Post-Training | 23 | 3.59E-02 | 2.90E-02                | 4.28E-02                |                         |                       |       |                                   |                       |       |                                        |                       |       |                          |                 |
|                                                              | VOA     | Baseline      | 23 | 3.87E-02 | 3.24E-02                | 4.50E-02                | -1.80E-02               | 3.77E-03              | <.001 |                                   |                       |       |                                        |                       |       |                          |                 |
|                                                              |         | Post-Training | 23 | 2.07E-02 | 1.60E-02                | 2.53E-02                |                         |                       |       |                                   |                       |       |                                        |                       |       |                          |                 |
| meanSpeeding3DBipolar                                        | Control | Baseline      | 23 | 4.60E-02 | 3.81E-02                | 5.39E-02                | -9.12E-03               | 5.11E-03              | 0.081 |                                   |                       | 0.222 | -1.57E-02                              | 4.18E-03              | <.001 | <b>4.06E-02</b>          | <b>1.12E-02</b> |
|                                                              |         | Post-Training | 23 | 3.69E-02 | 2.99E-02                | 4.39E-02                |                         |                       |       |                                   |                       |       |                                        |                       |       |                          |                 |
|                                                              | VOA     | Baseline      | 23 | 3.99E-02 | 3.35E-02                | 4.63E-02                | -1.87E-02               | 3.86E-03              | <.001 |                                   |                       |       |                                        |                       |       |                          |                 |
|                                                              |         | Post-Training | 23 | 2.12E-02 | 1.64E-02                | 2.60E-02                |                         |                       |       |                                   |                       |       |                                        |                       |       |                          |                 |
|                                                              | Control | Baseline      | 23 | 1.37E-02 | 1.04E-02                | 1.69E-02                | -6.27E-03               | 1.88E-03              | 0.002 | -2.04E-03                         | 1.94E-03              | 0.297 | 2.71E-04                               | 1.52E-03              | 0.859 | <b>1.12E-02</b>          | <b>4.16E-03</b> |

| Condition 1: Performance Metrics During the Entire Procedure |         |               |    |          |                         |                         | Within Group Comparison |                       |       | Baseline Between Group Comparison |                       |       | Post-Training Between Group Comparison |                       |       | Expert Benchmarks (n=14) |                 |  |  |  |  |  |  |  |
|--------------------------------------------------------------|---------|---------------|----|----------|-------------------------|-------------------------|-------------------------|-----------------------|-------|-----------------------------------|-----------------------|-------|----------------------------------------|-----------------------|-------|--------------------------|-----------------|--|--|--|--|--|--|--|
| Metric                                                       | Group   | Time          | N  | Mean     | 95.0% Lower CL for Mean | 95.0% Upper CL for Mean | Mean Difference         | Std. Error Difference | Sig.  | Mean Difference                   | Std. Error Difference | Sig.  | Mean Difference                        | Std. Error Difference | Sig.  | Mean                     | Std. Deviation  |  |  |  |  |  |  |  |
| medianAcceleration3DBipolar                                  |         | Post-Training | 23 | 7.42E-03 | 5.28E-03                | 9.57E-03                |                         |                       |       |                                   |                       |       |                                        |                       |       |                          |                 |  |  |  |  |  |  |  |
|                                                              | VOA     | Baseline      | 23 | 1.17E-02 | 9.43E-03                | 1.39E-02                | -3.96E-03               | 1.55E-03              | 0.014 |                                   |                       |       |                                        |                       |       |                          |                 |  |  |  |  |  |  |  |
|                                                              |         | Post-Training | 23 | 7.70E-03 | 5.38E-03                | 1.00E-02                |                         |                       |       |                                   |                       |       |                                        |                       |       |                          |                 |  |  |  |  |  |  |  |
| medianSpeeding3DBipolar                                      | Control | Baseline      | 23 | 1.41E-02 | 1.08E-02                | 1.75E-02                | -6.51E-03               | 1.95E-03              | 0.002 | -1.99E-03                         | 2.01E-03              | 0.327 | 1.92E-04                               | 1.58E-03              | 0.904 | <b>1.14E-02</b>          | <b>4.27E-03</b> |  |  |  |  |  |  |  |
|                                                              |         | Post-Training | 23 | 7.60E-03 | 5.36E-03                | 9.85E-03                |                         |                       |       |                                   |                       |       |                                        |                       |       |                          |                 |  |  |  |  |  |  |  |
|                                                              | VOA     | Baseline      | 23 | 1.21E-02 | 9.79E-03                | 1.45E-02                | -4.33E-03               | 1.61E-03              | 0.010 |                                   |                       |       |                                        |                       |       |                          |                 |  |  |  |  |  |  |  |
|                                                              |         | Post-Training | 23 | 7.80E-03 | 5.41E-03                | 1.02E-02                |                         |                       |       |                                   |                       |       |                                        |                       |       |                          |                 |  |  |  |  |  |  |  |
| medianSlowing3DBipolar                                       | Control | Baseline      | 23 | 1.33E-02 | 1.01E-02                | 1.64E-02                | -6.02E-03               | 1.82E-03              | 0.002 | -2.03E-03                         | 1.87E-03              | 0.282 | 3.39E-04                               | 1.47E-03              | 0.819 | <b>1.11E-02</b>          | <b>4.09E-03</b> |  |  |  |  |  |  |  |
|                                                              |         | Post-Training | 23 | 7.25E-03 | 5.19E-03                | 9.31E-03                |                         |                       |       |                                   |                       |       |                                        |                       |       |                          |                 |  |  |  |  |  |  |  |
|                                                              | VOA     | Baseline      | 23 | 1.12E-02 | 9.11E-03                | 1.34E-02                | -3.64E-03               | 1.49E-03              | 0.019 |                                   |                       |       |                                        |                       |       |                          |                 |  |  |  |  |  |  |  |
|                                                              |         | Post-Training | 23 | 7.59E-03 | 5.34E-03                | 9.84E-03                |                         |                       |       |                                   |                       |       |                                        |                       |       |                          |                 |  |  |  |  |  |  |  |
| medianConAcceleration3DBipolar                               | Control | Baseline      | 23 | 1.55E-02 | 1.20E-02                | 1.91E-02                | -6.73E-03               | 1.99E-03              | 0.001 | -2.04E-03                         | 2.12E-03              | 0.341 | 8.85E-04                               | 1.72E-03              | 0.609 | <b>1.17E-02</b>          | <b>4.71E-03</b> |  |  |  |  |  |  |  |
|                                                              |         | Post-Training | 23 | 8.81E-03 | 6.73E-03                | 1.09E-02                |                         |                       |       |                                   |                       |       |                                        |                       |       |                          |                 |  |  |  |  |  |  |  |
|                                                              | VOA     | Baseline      | 23 | 1.35E-02 | 1.10E-02                | 1.60E-02                | -3.80E-03               | 1.85E-03              | 0.046 |                                   |                       |       |                                        |                       |       |                          |                 |  |  |  |  |  |  |  |
|                                                              |         | Post-Training | 23 | 9.70E-03 | 6.77E-03                | 1.26E-02                |                         |                       |       |                                   |                       |       |                                        |                       |       |                          |                 |  |  |  |  |  |  |  |



**Table 2.** All Metrics Showing Significant Change During Tumor Removal (Condition 2)

| Condition 2: Performance Metrics During Tumor Removal |         |               |    |          |                         |                         | Within Group Comparison |                       |       | Baseline Between Group Comparison |                       |       | Post-Training Between Group Comparison |                       |       | Expert Benchmarks (n=14) |                |
|-------------------------------------------------------|---------|---------------|----|----------|-------------------------|-------------------------|-------------------------|-----------------------|-------|-----------------------------------|-----------------------|-------|----------------------------------------|-----------------------|-------|--------------------------|----------------|
| Metric                                                | Group   | Time          | N  | Mean     | 95.0% Lower CL for Mean | 95.0% Upper CL for Mean | Mean Difference         | Std. Error Difference | Sig.  | Mean Difference                   | Std. Error Difference | Sig.  | Mean Difference                        | Std. Error Difference | Sig.  | Mean                     | Std. Deviation |
| meanForceBipolarHand                                  | Control | Baseline      | 23 | 4.92E-01 | 3.80E-01                | 6.04E-01                | 8.05E-02                | 6.86E-02              | 0.246 | -9.02E-02                         | 6.90E-02              | 0.198 | -3.46E-01                              | 5.05E-02              | <.001 | 2.73E-01                 | 7.02E-02       |
|                                                       |         | Post-training | 23 | 5.73E-01 | 4.86E-01                | 6.59E-01                |                         |                       |       |                                   |                       |       |                                        |                       |       |                          |                |
|                                                       | VOA     | Baseline      | 23 | 4.02E-01 | 3.17E-01                | 4.87E-01                | -1.75E-01               | 4.87E-02              | <.001 |                                   |                       |       |                                        |                       |       |                          |                |
|                                                       |         | Post-training | 23 | 2.27E-01 | 1.72E-01                | 2.81E-01                |                         |                       |       |                                   |                       |       |                                        |                       |       |                          |                |
| meanTipDistance3D                                     | Control | Baseline      | 23 | 1.58E+01 | 1.14E+01                | 2.01E+01                | -2.85E+00               | 2.57E+00              | 0.272 | 3.66E+00                          | 4.82E+00              | 0.451 | -6.93E+00                              | 1.53E+00              | <.001 | 7.87E+00                 | 2.38E+00       |
|                                                       |         | Post-training | 23 | 1.29E+01 | 9.93E+00                | 1.59E+01                |                         |                       |       |                                   |                       |       |                                        |                       |       |                          |                |
|                                                       | VOA     | Baseline      | 23 | 1.94E+01 | 1.02E+01                | 2.87E+01                | -1.34E+01               | 4.47E+00              | 0.004 |                                   |                       |       |                                        |                       |       |                          |                |
|                                                       |         | Post-training | 23 | 5.98E+00 | 5.32E+00                | 6.63E+00                |                         |                       |       |                                   |                       |       |                                        |                       |       |                          |                |
| maxTipDistance3D                                      | Control | Baseline      | 23 | 3.81E+01 | 3.24E+01                | 4.38E+01                | 1.68E+00                | 5.03E+00              | 0.74  | 4.80E+00                          | 6.23E+00              | 0.445 | -2.41E+01                              | 4.66E+00              | <.001 | 3.41E+01                 | 1.71E+01       |
|                                                       |         | Post-training | 23 | 3.98E+01 | 3.11E+01                | 4.84E+01                |                         |                       |       |                                   |                       |       |                                        |                       |       |                          |                |
|                                                       | VOA     | Baseline      | 23 | 4.29E+01 | 3.10E+01                | 5.48E+01                | -2.72E+01               | 5.99E+00              | <.001 |                                   |                       |       |                                        |                       |       |                          |                |
|                                                       |         | Post-training | 23 | 1.57E+01 | 1.23E+01                | 1.92E+01                |                         |                       |       |                                   |                       |       |                                        |                       |       |                          |                |
| medianForceBipolarHand                                | Control | Baseline      | 23 | 4.86E-01 | 3.66E-01                | 6.05E-01                | 7.34E-02                | 7.12E-02              | 0.308 | -9.48E-02                         | 7.50E-02              | 0.212 | -3.39E-01                              | 5.08E-02              | <.001 | 2.67E-01                 | 8.28E-02       |
|                                                       |         | Post-training | 23 | 5.59E-01 | 4.74E-01                | 6.45E-01                |                         |                       |       |                                   |                       |       |                                        |                       |       |                          |                |
|                                                       | VOA     | Baseline      | 23 | 3.91E-01 | 2.95E-01                | 4.87E-01                | -1.71E-01               | 5.40E-02              | 0.003 |                                   |                       |       |                                        |                       |       |                          |                |
|                                                       |         | Post-training | 23 | 2.20E-01 | 1.63E-01                | 2.78E-01                |                         |                       |       |                                   |                       |       |                                        |                       |       |                          |                |
| meanConForceBipolarHand                               | Control | Baseline      | 23 | 5.07E-03 | 3.21E-03                | 6.93E-03                | -1.23E-03               | 9.32E-04              | 0.195 | -7.81E-04                         | 1.01E-03              | 0.441 | -8.98E-04                              | 3.26E-04              | 0.008 | 1.08E-02                 | 3.12E-03       |
|                                                       |         | Post-training | 23 | 3.85E-03 | 3.35E-03                | 4.34E-03                |                         |                       |       |                                   |                       |       |                                        |                       |       |                          |                |
|                                                       | VOA     | Baseline      | 23 | 4.29E-03 | 3.51E-03                | 5.07E-03                | -1.34E-03               | 4.34E-04              | 0.003 |                                   |                       |       |                                        |                       |       |                          |                |
|                                                       |         | Post-training | 23 | 2.95E-03 | 2.50E-03                | 3.40E-03                |                         |                       |       |                                   |                       |       |                                        |                       |       |                          |                |
| meanVelocity3DCursor                                  | Control | Baseline      | 23 | 1.49E-01 | 1.25E-01                | 1.72E-01                | 1.46E-02                | 1.33E-02              | 0.28  | 3.95E-04                          | 1.63E-02              | 0.981 | -4.33E-02                              | 1.07E-02              | <.001 | 2.70E-01                 | 8.33E-02       |
|                                                       |         | Post-training | 23 | 1.63E-01 | 1.49E-01                | 1.77E-01                |                         |                       |       |                                   |                       |       |                                        |                       |       |                          |                |
|                                                       | VOA     | Baseline      | 23 | 1.49E-01 | 1.25E-01                | 1.73E-01                | -2.92E-02               | 1.43E-02              | 0.048 |                                   |                       |       |                                        |                       |       |                          |                |
|                                                       |         | Post-training | 23 | 1.20E-01 | 1.03E-01                | 1.37E-01                |                         |                       |       |                                   |                       |       |                                        |                       |       |                          |                |
| meanConverging3D                                      | Control | Baseline      | 23 | 8.43E-02 | 7.05E-02                | 9.80E-02                | 3.56E-03                | 7.83E-03              | 0.651 | 3.52E-03                          | 1.01E-02              | 0.729 | -2.25E-02                              | 6.98E-03              | 0.002 | 1.92E-01                 | 4.28E-02       |
|                                                       |         | Post-training | 23 | 8.78E-02 | 7.93E-02                | 9.63E-02                |                         |                       |       |                                   |                       |       |                                        |                       |       |                          |                |
|                                                       | VOA     | Baseline      | 23 | 8.78E-02 | 7.19E-02                | 1.04E-01                | -2.24E-02               | 9.56E-03              | 0.024 |                                   |                       |       |                                        |                       |       |                          |                |
|                                                       |         | Post-training | 23 | 6.54E-02 | 5.34E-02                | 7.73E-02                |                         |                       |       |                                   |                       |       |                                        |                       |       |                          |                |
| maxConForceBipolarHand                                | Control | Baseline      | 23 | 1.88E-01 | 1.21E-01                | 2.54E-01                | 1.14E-02                | 4.09E-02              | 0.782 | -3.52E-02                         | 3.92E-02              | 0.374 | -1.11E-01                              | 2.74E-02              | <.001 | 2.36E-01                 | 9.80E-02       |
|                                                       |         | Post-training | 23 | 1.99E-01 | 1.47E-01                | 2.51E-01                |                         |                       |       |                                   |                       |       |                                        |                       |       |                          |                |
|                                                       | VOA     | Baseline      | 23 | 1.52E-01 | 1.09E-01                | 1.96E-01                | -6.40E-02               | 2.26E-02              | 0.007 |                                   |                       |       |                                        |                       |       |                          |                |

| Condition 2: Performance Metrics During Tumor Removal |         |               |    |          |                         |                         | Within Group Comparison |                       |       | Baseline Between Group Comparison |                       |       | Post-Training Between Group Comparison |                       |       | Expert Benchmarks (n=14) |                |
|-------------------------------------------------------|---------|---------------|----|----------|-------------------------|-------------------------|-------------------------|-----------------------|-------|-----------------------------------|-----------------------|-------|----------------------------------------|-----------------------|-------|--------------------------|----------------|
| Metric                                                | Group   | Time          | N  | Mean     | 95.0% Lower CL for Mean | 95.0% Upper CL for Mean | Mean Difference         | Std. Error Difference | Sig.  | Mean Difference                   | Std. Error Difference | Sig.  | Mean Difference                        | Std. Error Difference | Sig.  | Mean                     | Std. Deviation |
|                                                       |         | Post-training | 23 | 8.84E-02 | 7.15E-02                | 1.05E-01                |                         |                       |       |                                   |                       |       |                                        |                       |       |                          |                |
| maxVelocity3DBipolar                                  | Control | Baseline      | 23 | 1.71E+00 | 1.30E+00                | 2.12E+00                | 1.34E-01                | 2.76E-01              | 0.629 | -7.83E-02                         | 2.62E-01              | 0.766 | -1.14E+00                              | 2.16E-01              | <.001 | 3.31E+00                 | 1.28E+00       |
|                                                       |         | Post-training | 23 | 1.84E+00 | 1.44E+00                | 2.24E+00                |                         |                       |       |                                   |                       |       |                                        |                       |       |                          |                |
|                                                       | VOA     | Baseline      | 23 | 1.63E+00 | 1.28E+00                | 1.97E+00                | -9.26E-01               | 1.86E-01              | <.001 |                                   |                       |       |                                        |                       |       |                          |                |
|                                                       |         | Post-training | 23 | 7.01E-01 | 5.28E-01                | 8.74E-01                |                         |                       |       |                                   |                       |       |                                        |                       |       |                          |                |
| maxDiverging3D                                        | Control | Baseline      | 23 | 1.39E+00 | 9.72E-01                | 1.81E+00                | 3.14E-01                | 2.76E-01              | 0.262 | 4.43E-02                          | 2.79E-01              | 0.875 | -1.10E+00                              | 2.09E-01              | <.001 | 2.72E+00                 | 1.35E+00       |
|                                                       |         | Post-training | 23 | 1.70E+00 | 1.32E+00                | 2.09E+00                |                         |                       |       |                                   |                       |       |                                        |                       |       |                          |                |
|                                                       | VOA     | Baseline      | 23 | 1.43E+00 | 1.04E+00                | 1.83E+00                | -8.33E-01               | 2.05E-01              | <.001 |                                   |                       |       |                                        |                       |       |                          |                |
|                                                       |         | Post-training | 23 | 6.02E-01 | 4.43E-01                | 7.62E-01                |                         |                       |       |                                   |                       |       |                                        |                       |       |                          |                |
| meanAcceleration3DCusa                                | Control | Baseline      | 23 | 2.51E-02 | 2.21E-02                | 2.80E-02                | 2.41E-03                | 1.88E-03              | 0.205 | 3.74E-03                          | 4.15E-03              | 0.372 | -7.19E-03                              | 1.81E-03              | <.001 | 6.12E-02                 | 1.52E-02       |
|                                                       |         | Post-training | 23 | 2.75E-02 | 2.50E-02                | 3.00E-02                |                         |                       |       |                                   |                       |       |                                        |                       |       |                          |                |
|                                                       | VOA     | Baseline      | 23 | 2.88E-02 | 2.05E-02                | 3.72E-02                | -8.52E-03               | 4.26E-03              | 0.047 |                                   |                       |       |                                        |                       |       |                          |                |
|                                                       |         | Post-training | 23 | 2.03E-02 | 1.75E-02                | 2.31E-02                |                         |                       |       |                                   |                       |       |                                        |                       |       |                          |                |
| meanSlowing3DCusa                                     | Control | Baseline      | 23 | 2.49E-02 | 2.19E-02                | 2.79E-02                | 2.09E-03                | 1.85E-03              | 0.264 | 1.34E-03                          | 2.58E-03              | 0.606 | -5.97E-03                              | 1.77E-03              | 0.001 | 5.54E-02                 | 1.03E-02       |
|                                                       |         | Post-training | 23 | 2.70E-02 | 2.46E-02                | 2.93E-02                |                         |                       |       |                                   |                       |       |                                        |                       |       |                          |                |
|                                                       | VOA     | Baseline      | 23 | 2.62E-02 | 2.17E-02                | 3.07E-02                | -5.23E-03               | 2.57E-03              | 0.048 |                                   |                       |       |                                        |                       |       |                          |                |
|                                                       |         | Post-training | 23 | 2.10E-02 | 1.82E-02                | 2.38E-02                |                         |                       |       |                                   |                       |       |                                        |                       |       |                          |                |
| maxAcceleration3DBipolar                              | Control | Baseline      | 23 | 6.30E-01 | 4.68E-01                | 7.91E-01                | -2.10E-02               | 1.08E-01              | 0.847 | -1.16E-01                         | 1.11E-01              | 0.298 | -3.65E-01                              | 8.24E-02              | <.001 | 3.55E-01                 | 1.31E-01       |
|                                                       |         | Post-training | 23 | 6.09E-01 | 4.54E-01                | 7.63E-01                |                         |                       |       |                                   |                       |       |                                        |                       |       |                          |                |
|                                                       | VOA     | Baseline      | 23 | 5.13E-01 | 3.52E-01                | 6.75E-01                | -2.69E-01               | 8.24E-02              | 0.002 |                                   |                       |       |                                        |                       |       |                          |                |
|                                                       |         | Post-training | 23 | 2.44E-01 | 1.87E-01                | 3.01E-01                |                         |                       |       |                                   |                       |       |                                        |                       |       |                          |                |
| maxSpeeding3DBipolar                                  | Control | Baseline      | 23 | 5.62E-01 | 4.07E-01                | 7.17E-01                | -2.48E-02               | 1.03E-01              | 0.811 | -1.04E-01                         | 1.07E-01              | 0.335 | -3.20E-01                              | 7.79E-02              | <.001 | 9.55E-01                 | 3.76E-01       |
|                                                       |         | Post-training | 23 | 5.37E-01 | 3.92E-01                | 6.82E-01                |                         |                       |       |                                   |                       |       |                                        |                       |       |                          |                |
|                                                       | VOA     | Baseline      | 23 | 4.58E-01 | 3.01E-01                | 6.15E-01                | -2.41E-01               | 8.06E-02              | 0.005 |                                   |                       |       |                                        |                       |       |                          |                |
|                                                       |         | Post-training | 23 | 2.17E-01 | 1.59E-01                | 2.74E-01                |                         |                       |       |                                   |                       |       |                                        |                       |       |                          |                |
| maxSlowing3DBipolar                                   | Control | Baseline      | 23 | 3.89E-01 | 2.64E-01                | 5.13E-01                | 4.86E-02                | 9.47E-02              | 0.612 | -2.61E-02                         | 7.75E-02              | 0.737 | -2.32E-01                              | 7.89E-02              | 0.005 | 8.95E-01                 | 3.48E-01       |
|                                                       |         | Post-training | 23 | 4.37E-01 | 2.87E-01                | 5.88E-01                |                         |                       |       |                                   |                       |       |                                        |                       |       |                          |                |
|                                                       | VOA     | Baseline      | 23 | 3.63E-01 | 2.65E-01                | 4.60E-01                | -1.57E-01               | 5.17E-02              | 0.004 |                                   |                       |       |                                        |                       |       |                          |                |
|                                                       |         | Post-training | 23 | 2.05E-01 | 1.61E-01                | 2.49E-01                |                         |                       |       |                                   |                       |       |                                        |                       |       |                          |                |
| medianSpeeding3DCusa                                  | Control | Baseline      | 23 | 1.22E-02 | 1.08E-02                | 1.36E-02                | 2.88E-05                | 8.04E-04              | 0.972 | -7.91E-05                         | 1.12E-03              | 0.944 | -2.58E-03                              | 7.95E-04              | 0.002 | 3.76E-02                 | 1.29E-02       |
|                                                       |         | Post-training | 23 | 1.22E-02 | 1.13E-02                | 1.31E-02                |                         |                       |       |                                   |                       |       |                                        |                       |       |                          |                |
|                                                       | VOA     | Baseline      | 23 | 1.21E-02 | 1.02E-02                | 1.39E-02                | -2.48E-03               | 1.13E-03              | 0.034 |                                   |                       |       |                                        |                       |       |                          |                |

| Condition 2: Performance Metrics During Tumor Removal |         |               |    |          |                         |                         | Within Group Comparison |                       |       | Baseline Between Group Comparison |                       |       | Post-Training Between Group Comparison |                       |       | Expert Benchmarks (n=14) |                |
|-------------------------------------------------------|---------|---------------|----|----------|-------------------------|-------------------------|-------------------------|-----------------------|-------|-----------------------------------|-----------------------|-------|----------------------------------------|-----------------------|-------|--------------------------|----------------|
| Metric                                                | Group   | Time          | N  | Mean     | 95.0% Lower CL for Mean | 95.0% Upper CL for Mean | Mean Difference         | Std. Error Difference | Sig.  | Mean Difference                   | Std. Error Difference | Sig.  | Mean Difference                        | Std. Error Difference | Sig.  | Mean                     | Std. Deviation |
|                                                       |         | Post-training | 23 | 9.60E-03 | 8.19E-03                | 1.10E-02                |                         |                       |       |                                   |                       |       |                                        |                       |       |                          |                |
| maxConAcceleration3DBipolar                           | Control | Baseline      | 23 | 6.90E-01 | 5.14E-01                | 8.65E-01                | -2.88E-02               | 1.14E-01              | 0.802 | -6.03E-02                         | 1.16E-01              | 0.607 | -3.28E-01                              | 8.73E-02              | <.001 | 1.28E+00                 | 5.06E-01       |
|                                                       |         | Post-training | 23 | 6.61E-01 | 5.04E-01                | 8.18E-01                |                         |                       |       |                                   |                       |       |                                        |                       |       |                          |                |
|                                                       | VOA     | Baseline      | 23 | 6.30E-01 | 4.67E-01                | 7.93E-01                | -2.97E-01               | 8.71E-02              | 0.001 |                                   |                       |       |                                        |                       |       |                          |                |
|                                                       |         | Post-training | 23 | 3.33E-01 | 2.55E-01                | 4.11E-01                |                         |                       |       |                                   |                       |       |                                        |                       |       |                          |                |
| maxForceBipolarHand                                   | Control | Baseline      | 23 | 8.84E-01 | 7.36E-01                | 1.03E+00                | 1.58E-01                | 9.20E-02              | 0.091 | -9.09E-02                         | 9.39E-02              | 0.338 | -4.84E-01                              | 8.22E-02              | <.001 | 6.78E-01                 | 1.33E-01       |
|                                                       |         | Post-training | 23 | 1.04E+00 | 9.24E-01                | 1.16E+00                |                         |                       |       |                                   |                       |       |                                        |                       |       |                          |                |
|                                                       | VOA     | Baseline      | 23 | 7.93E-01 | 6.71E-01                | 9.16E-01                | -2.35E-01               | 8.32E-02              | 0.007 |                                   |                       |       |                                        |                       |       |                          |                |
|                                                       |         | Post-training | 23 | 5.59E-01 | 4.37E-01                | 6.80E-01                |                         |                       |       |                                   |                       |       |                                        |                       |       |                          |                |
| medianTipDistance3D                                   | Control | Baseline      | 23 | 1.42E+01 | 9.35E+00                | 1.91E+01                | -4.41E+00               | 2.67E+00              | 0.105 | 4.10E+00                          | 5.48E+00              | 0.458 | -4.21E+00                              | 1.34E+00              | 0.003 | 6.80E+00                 | 2.38E+00       |
|                                                       |         | Post-training | 23 | 9.80E+00 | 7.20E+00                | 1.24E+01                |                         |                       |       |                                   |                       |       |                                        |                       |       |                          |                |
|                                                       | VOA     | Baseline      | 23 | 1.83E+01 | 7.70E+00                | 2.89E+01                | -1.27E+01               | 5.12E+00              | 0.017 |                                   |                       |       |                                        |                       |       |                          |                |
|                                                       |         | Post-training | 23 | 5.59E+00 | 5.00E+00                | 6.19E+00                |                         |                       |       |                                   |                       |       |                                        |                       |       |                          |                |
| meanDiverging3D                                       | Control | Baseline      | 23 | 8.10E-02 | 6.85E-02                | 9.34E-02                | 1.03E-02                | 7.24E-03              | 0.161 | 3.37E-03                          | 8.70E-03              | 0.7   | -2.50E-02                              | 6.64E-03              | <.001 | 2.44E-01                 | 7.93E-02       |
|                                                       |         | Post-training | 23 | 9.13E-02 | 8.31E-02                | 9.95E-02                |                         |                       |       |                                   |                       |       |                                        |                       |       |                          |                |
|                                                       | VOA     | Baseline      | 23 | 8.43E-02 | 7.14E-02                | 9.73E-02                | -1.81E-02               | 8.27E-03              | 0.034 |                                   |                       |       |                                        |                       |       |                          |                |
|                                                       |         | Post-training | 23 | 6.62E-02 | 5.50E-02                | 7.74E-02                |                         |                       |       |                                   |                       |       |                                        |                       |       |                          |                |
