# Supplementary material for: AI in Surgical Curriculum Design and Unintended Outcomes for Technical Competencies in Simulation Training
Source: PubMed Central journal article supplement (PMC10509729; doi:10.1001/jamanetworkopen.2023.34658), 2023-09-19
Supplement: jamanetwopen-e2334658-s002.pdf [file jamanetwopen-e2334658-s002.pdf]

## Data Sharing Statement

Fazlollahi. AI in Surgical Curriculum Design and Unintended Outcomes for Technical Competencies in Simulation Training. *JAMA Netw Open*. Published September 19, 2023. doi:10.1001/jamanetworkopen.2023.34658

### Data

**Data available:** Yes

**Data types:** Deidentified participant data

**How to access data:** Upon request from authors Fazlollahi and Del Maestro. Contact [ali.fazlollahi@mail.mcgill.ca](mailto:ali.fazlollahi@mail.mcgill.ca) and [rolando.del\\_maestro@mcgill.ca](mailto:rolando.del_maestro@mcgill.ca).

**When available:** With publication

### Supporting Documents

**Document types:** None

### Additional Information

**Who can access the data:** Researchers whose proposed use of the data has been approved.

**Types of analyses:** Any purpose.

**Mechanisms of data availability:** With a signed data access agreement.
